# Supplementary material
Source: PubMed Central journal article supplement (PMC3654801)

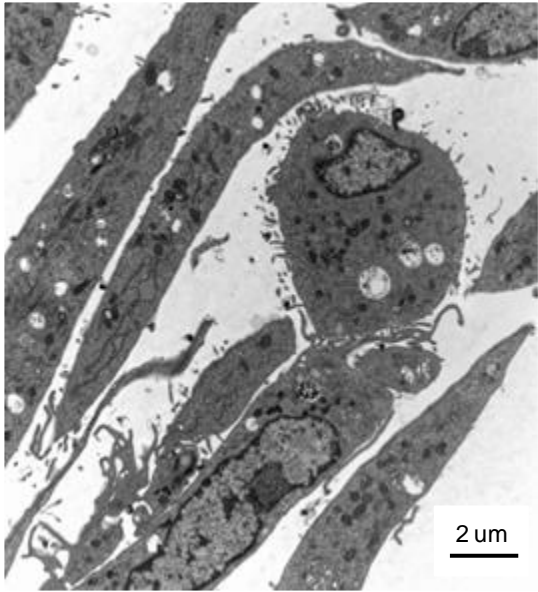

Supplement: NIHMS403174-supplement-01.pdf [file NIHMS403174-supplement-01.pdf]

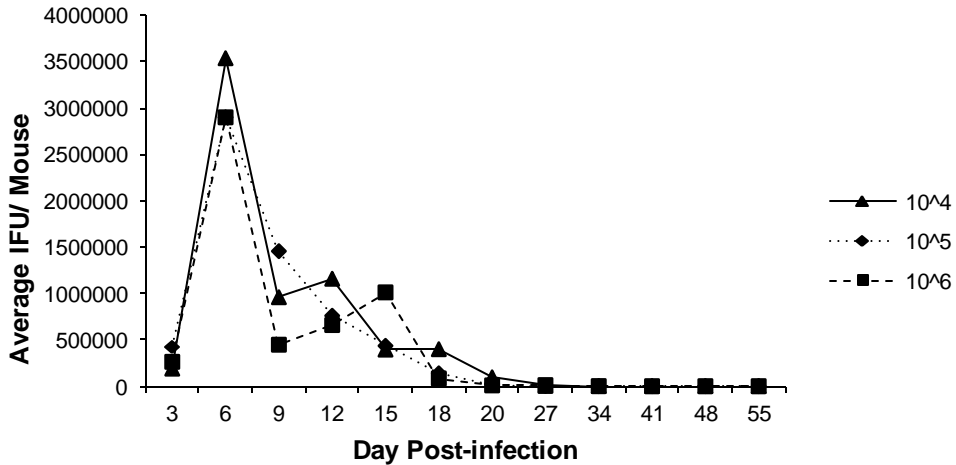

Supplement: NIHMS403174-supplement-02.pdf [file NIHMS403174-supplement-02.pdf]

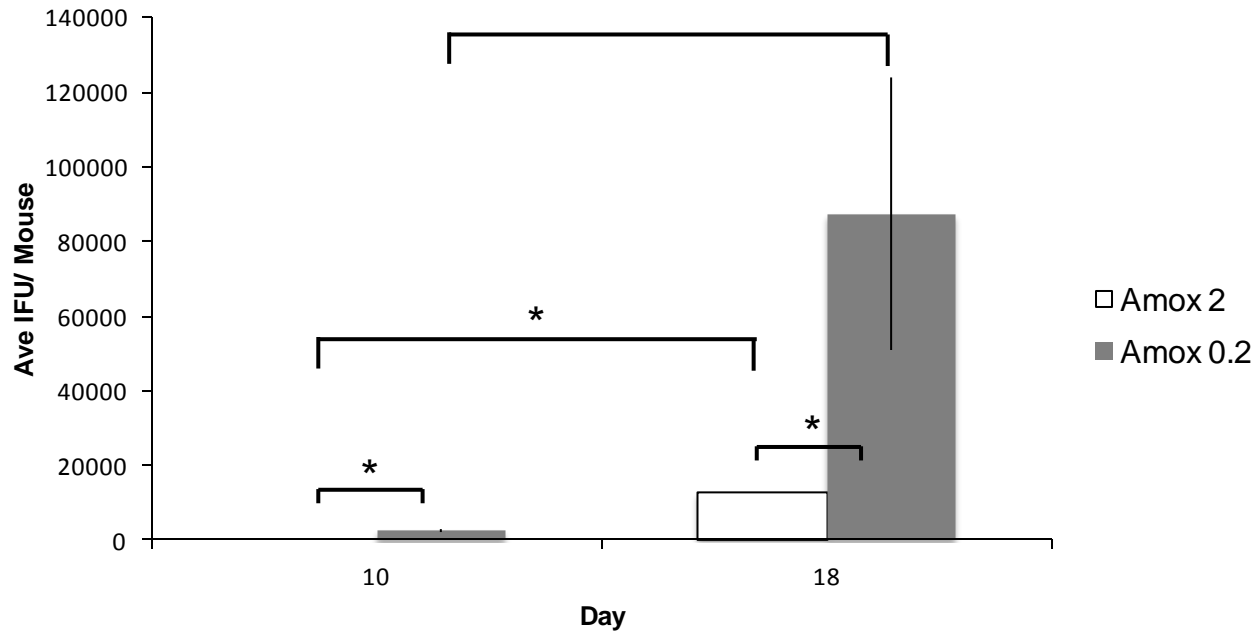

Supplement: NIHMS403174-supplement-03.pdf [file NIHMS403174-supplement-03.pdf]
